# Supplementary material for: Do men avoid seeking medical advice? A register-based analysis of gender-specific changes in primary healthcare use after first hospitalisation at ages 60+ in Denmark
Source: PubMed Central journal article supplement — J Epidemiol Community Health. 2020 Jun 10;74(7):573–9. doi: 10.1136/jech-2019-213435 (PMC7337231; doi:10.1136/jech-2019-213435), 2020-06-10
Supplement: jech-2019-213435s001.pdf [file jech-2019-213435s001.pdf]

**Supplementary Table 1:** Overview of the stepwise model development process; models were developed separately by cause of admission.

| Cause  | Model | Model for zero-counts      | Model for positive counts                                          | AIC       | dAIC | DF |
|--------|-------|----------------------------|--------------------------------------------------------------------|-----------|------|----|
| Stroke | 1     | After + Sex + Age + (1 ID) | Temporal Distance * After + Sex + Age + (1 ID)                     | 1,014,319 | 753  | 17 |
| Stroke | 2     | After + Sex + Age + (1 ID) | Temporal Distance * After + Sex * After + Age + (1 ID)             | 1,013,961 | 395  | 18 |
| Stroke | 3     | After + Sex + Age + (1 ID) | lin.spline(Temporal Distance) * After + Sex + Age + (1 ID)         | 1,013,925 | 359  | 19 |
| Stroke | 4     | After + Sex + Age + (1 ID) | lin.spline(Temporal Distance) * After + Sex * After + Age + (1 ID) | 1,013,566 | 0    | 20 |
| Stroke | 5     | After * Sex + Age + (1 ID) | lin.spline(Temporal Distance) * After + Sex * After + Age + (1 ID) | 1,013,567 | 1    | 21 |
| MI     | 1     | After + Sex + Age + (1 ID) | Temporal Distance * After + Sex + Age + (1 ID)                     | 719,204   | 468  | 17 |
| MI     | 2     | After + Sex + Age + (1 ID) | Temporal Distance * After + Sex * After + Age + (1 ID)             | 718,932   | 195  | 18 |
| MI     | 3     | After + Sex + Age + (1 ID) | lin.spline(Temporal Distance) * After + Sex + Age + (1 ID)         | 719,012   | 275  | 19 |
| MI     | 4     | After + Sex + Age + (1 ID) | lin.spline(Temporal Distance) * After + Sex * After + Age + (1 ID) | 718,739   | 2    | 20 |
| MI     | 5     | After * Sex + Age + (1 ID) | lin.spline(Temporal Distance) * After + Sex * After + Age + (1 ID) | 718,737   | 0    | 21 |
| COPD   | 1     | After + Sex + Age + (1 ID) | Temporal Distance * After + Sex + Age + (1 ID)                     | 447,466   | 176  | 17 |
| COPD   | 2     | After + Sex + Age + (1 ID) | Temporal Distance * After + Sex * After + Age + (1 ID)             | 447,368   | 79   | 18 |
| COPD   | 3     | After + Sex + Age + (1 ID) | lin.spline(Temporal Distance) * After + Sex + Age + (1 ID)         | 447,399   | 110  | 19 |
| COPD   | 4     | After + Sex + Age + (1 ID) | lin.spline(Temporal Distance) * After + Sex * After + Age + (1 ID) | 447,302   | 12   | 20 |
| COPD   | 5     | After * Sex + Age + (1 ID) | lin.spline(Temporal Distance) * After + Sex * After + Age + (1 ID) | 447,289   | 0    | 21 |
| GIC    | 1     | After + Sex + Age + (1 ID) | Temporal Distance * After + Sex + Age + (1 ID)                     | 513,393   | 274  | 17 |
| GIC    | 2     | After + Sex + Age + (1 ID) | Temporal Distance * After + Sex * After + Age + (1 ID)             | 513,289   | 169  | 18 |
| GIC    | 3     | After + Sex + Age + (1 ID) | lin.spline(Temporal Distance) * After + Sex + Age + (1 ID)         | 513,228   | 109  | 19 |
| GIC    | 4     | After + Sex + Age + (1 ID) | lin.spline(Temporal Distance) * After + Sex * After + Age + (1 ID) | 513,123   | 3    | 20 |
| GIC    | 5     | After * Sex + Age + (1 ID) | lin.spline(Temporal Distance) * After + Sex * After + Age + (1 ID) | 513,119   | 0    | 21 |

Note: (1|D) stands for individual random effect
