# Supplementary material for: Do men avoid seeking medical advice? A register-based analysis of gender-specific changes in primary healthcare use after first hospitalisation at ages 60+ in Denmark
Source: PubMed Central journal article supplement — J Epidemiol Community Health. 2020 Jun 10;74(7):573–9. doi: 10.1136/jech-2019-213435 (PMC7337231; doi:10.1136/jech-2019-213435), 2020-06-10
Supplement: jech-2019-213435s005.pdf [file jech-2019-213435s005.pdf]

**Supplementary Table 2:** Overview of the stepwise model development process; survivors of the 33-month study period.

| Cause  | Model | Model for zero-counts      | Model for positive counts                                          | AIC     | dAIC | DF |
|--------|-------|----------------------------|--------------------------------------------------------------------|---------|------|----|
| Stroke | 1     | After + Sex + Age + (1 ID) | Temporal Distance * After + Sex + Age + (1 ID)                     | 783,611 | 753  | 17 |
| Stroke | 2     | After + Sex + Age + (1 ID) | Temporal Distance * After + Sex * After + Age + (1 ID)             | 783,310 | 395  | 18 |
| Stroke | 3     | After + Sex + Age + (1 ID) | lin.spline(Temporal Distance) * After + Sex + Age + (1 ID)         | 783,224 | 359  | 19 |
| Stroke | 4     | After + Sex + Age + (1 ID) | lin.spline(Temporal Distance) * After + Sex * After + Age + (1 ID) | 782,922 | 0    | 20 |
| Stroke | 5     | After * Sex + Age + (1 ID) | lin.spline(Temporal Distance) * After + Sex * After + Age + (1 ID) | 782,923 | 1    | 21 |
| MI     | 1     | After + Sex + Age + (1 ID) | Temporal Distance * After + Sex + Age + (1 ID)                     | 585,568 | 452  | 17 |
| MI     | 2     | After + Sex + Age + (1 ID) | Temporal Distance * After + Sex * After + Age + (1 ID)             | 585,347 | 231  | 18 |
| MI     | 3     | After + Sex + Age + (1 ID) | lin.spline(Temporal Distance) * After + Sex + Age + (1 ID)         | 585,342 | 225  | 19 |
| MI     | 4     | After + Sex + Age + (1 ID) | lin.spline(Temporal Distance) * After + Sex * After + Age + (1 ID) | 585,120 | 4    | 20 |
| MI     | 5     | After * Sex + Age + (1 ID) | lin.spline(Temporal Distance) * After + Sex * After + Age + (1 ID) | 585,116 | 0    | 21 |
| COPD   | 1     | After + Sex + Age + (1 ID) | Temporal Distance * After + Sex + Age + (1 ID)                     | 320,473 | 131  | 17 |
| COPD   | 2     | After + Sex + Age + (1 ID) | Temporal Distance * After + Sex * After + Age + (1 ID)             | 320,395 | 53   | 18 |
| COPD   | 3     | After + Sex + Age + (1 ID) | lin.spline(Temporal Distance) * After + Sex + Age + (1 ID)         | 320,426 | 84   | 19 |
| COPD   | 4     | After + Sex + Age + (1 ID) | lin.spline(Temporal Distance) * After + Sex * After + Age + (1 ID) | 320,349 | 6    | 20 |
| COPD   | 5     | After * Sex + Age + (1 ID) | lin.spline(Temporal Distance) * After + Sex * After + Age + (1 ID) | 320,342 | 0    | 21 |
| GIC    | 1     | After + Sex + Age + (1 ID) | Temporal Distance * After + Sex + Age + (1 ID)                     | 287,754 | 171  | 17 |
| GIC    | 2     | After + Sex + Age + (1 ID) | Temporal Distance * After + Sex * After + Age + (1 ID)             | 287,685 | 101  | 18 |
| GIC    | 3     | After + Sex + Age + (1 ID) | lin.spline(Temporal Distance) * After + Sex + Age + (1 ID)         | 287,656 | 72   | 19 |
| GIC    | 4     | After + Sex + Age + (1 ID) | lin.spline(Temporal Distance) * After + Sex * After + Age + (1 ID) | 287,586 | 2    | 20 |
| GIC    | 5     | After * Sex + Age + (1 ID) | lin.spline(Temporal Distance) * After + Sex * After + Age + (1 ID) | 287,584 | 0    | 21 |

Note: (1|D) stands for individual random effect
