# Supplementary material for: Do men avoid seeking medical advice? A register-based analysis of gender-specific changes in primary healthcare use after first hospitalisation at ages 60+ in Denmark
Source: PubMed Central journal article supplement — J Epidemiol Community Health. 2020 Jun 10;74(7):573–9. doi: 10.1136/jech-2019-213435 (PMC7337231; doi:10.1136/jech-2019-213435), 2020-06-10
Supplement: jech-2019-213435s006.pdf [file jech-2019-213435s006.pdf]

**Supplementary Table 3:** Number and percentage of hospital admissions by gender and cause of admission; survivors of the 33-month study period.

| Cause of Admission | ICD-10 Chapter | Men           |              | Women         |              |
|--------------------|----------------|---------------|--------------|---------------|--------------|
|                    |                | No.           | in %         | No.           | in %         |
| Stroke             | I.61 – I.64    | 8,388         | 37.4         | 8,432         | 41.6         |
| MI                 | I.21 – I.22    | 8,065         | 36.0         | 4,873         | 24.1         |
| COPD               | J.40 – J.47    | 2,651         | 11.8         | 3,778         | 18.6         |
| GIC                | C.15 – C.26    | 3,319         | 14.8         | 3,177         | 15.7         |
| <b>Total</b>       | -              | <b>22,423</b> | <b>100.0</b> | <b>20,260</b> | <b>100.0</b> |
