# Supplementary material for: Do men avoid seeking medical advice? A register-based analysis of gender-specific changes in primary healthcare use after first hospitalisation at ages 60+ in Denmark
Source: PubMed Central journal article supplement — J Epidemiol Community Health. 2020 Jun 10;74(7):573–9. doi: 10.1136/jech-2019-213435 (PMC7337231; doi:10.1136/jech-2019-213435), 2020-06-10
Supplement: jech-2019-213435s007.pdf [file jech-2019-213435s007.pdf]

**Supplementary Table 4:** Results of hurdle regression models; survivors of the 33-month study period.

| <b>Log. Model<br/>for Zero Counts</b>   | <b>Stroke<br/>Est. (95% CI)</b> | <b>MI<br/>Est. (95% CI)</b> | <b>COPD<br/>Est. (95% CI)</b> | <b>GIC<br/>Est. (95% CI)</b> |
|-----------------------------------------|---------------------------------|-----------------------------|-------------------------------|------------------------------|
| Intercept                               | 0.176 (0.080-0.271)             | 0.176 (0.076-0.276)         | 0.032 (0.000-0.211)           | 0.191 (0.060-0.321)          |
| After                                   | 0.066 (0.000-0.136)             | 0.076 (0.000-0.169)         | 0.192 (0.081-0.303)           | 0.304 (0.222-0.386)          |
| Men                                     | 1.870 (1.790-1.951)             | 2.013 (1.923-2.103)         | 2.307 (2.150-2.464)           | 1.863 (1.742-1.984)          |
| Men*After                               | 0.942 (0.851-1.033)             | 0.868 (0.758-0.978)         | 0.793 (0.635-0.951)           | 0.894 (0.786-1.001)          |
| Age 70-79                               | 0.566 (0.470-0.661)             | 0.489 (0.396-0.583)         | 0.609 (0.439-0.779)           | 0.426 (0.294-0.558)          |
| Age 80-89                               | 0.390 (0.278-0.502)             | 0.317 (0.192-0.441)         | 0.446 (0.212-0.680)           | 0.272 (0.095-0.449)          |
| Age 90+                                 | 0.362 (0.076-0.649)             | 0.331 (0.002-0.659)         | 0.921 (0.096-1.746)           | 0.153 (0.000-0.837)          |
| <b>NB Model<br/>for Positive Counts</b> | <b>Stroke<br/>Est. (95% CI)</b> | <b>MI<br/>Est. (95% CI)</b> | <b>COPD<br/>Est. (95% CI)</b> | <b>GIC<br/>Est. (95% CI)</b> |
| Intercept                               | 3.601 (3.579-3.623)             | 3.508 (3.483-3.532)         | 4.875 (4.846-4.904)           | 3.313 (3.276-3.350)          |
| lin.spl.(Temp.Dist.)1                   | 0.953 (0.940-0.967)             | 0.957 (0.942-0.972)         | 0.925 (0.908-0.942)           | 0.886 (0.864-0.908)          |
| lin.spl.(Temp.Dist.)2                   | 0.887 (0.874-0.901)             | 0.889 (0.874-0.905)         | 0.820 (0.802-0.838)           | 0.804 (0.782-0.827)          |
| After                                   | 1.731 (1.717-1.745)             | 1.677 (1.661-1.693)         | 1.285 (1.267-1.304)           | 1.221 (1.198-1.245)          |
| lin.spl.(Temp.Dist.)1*After             | 0.924 (0.907-0.941)             | 0.923 (0.905-0.942)         | 1.041 (1.018-1.064)           | 1.042 (1.013-1.071)          |
| lin.spl.(Temp.Dist.)2*After             | 0.977 (0.960-0.994)             | 0.937 (0.918-0.956)         | 1.246 (1.222-1.269)           | 1.194 (1.164-1.223)          |
| Men                                     | 0.801 (0.783-0.819)             | 0.781 (0.760-0.801)         | 0.846 (0.818-0.874)           | 0.824 (0.793-0.856)          |
| Men*After                               | 1.114 (1.102-1.126)             | 1.109 (1.095-1.122)         | 1.079 (1.062-1.096)           | 1.094 (1.073-1.115)          |
| Age 70-79                               | 1.101 (1.081-1.121)             | 1.127 (1.106-1.148)         | 1.080 (1.050-1.110)           | 1.182 (1.147-1.216)          |
| Age 80-89                               | 1.127 (1.104-1.150)             | 1.195 (1.169-1.221)         | 1.105 (1.065-1.145)           | 1.267 (1.224-1.311)          |
| Age 90+                                 | 1.090 (1.034-1.145)             | 1.149 (1.082-1.215)         | 0.986 (0.838-1.145)           | 1.354 (1.206-1.502)          |
| <i>No. of Observations</i>              | 168,200                         | 129,389                     | 64,290                        | 64,960                       |
| <i>No. of Groups</i>                    | 16,820                          | 12,938                      | 6,429                         | 6,496                        |
| <i>VAR Ind. RE Log. Model</i>           | 4.19                            | 3.59                        | 5.44                          | 3.56                         |
| <i>VAR Ind. RE NB Model</i>             | 0.22                            | 0.22                        | 0.25                          | 0.28                         |
| <i>Overdisp. Par. NB Model</i>          | 12.80                           | 17.50                       | 16.60                         | 11.30                        |
