# Supplementary figures and images for: Do men avoid seeking medical advice? A register-based analysis of gender-specific changes in primary healthcare use after first hospitalisation at ages 60+ in Denmark
Source: PubMed Central journal article supplement — J Epidemiol Community Health. 2020 Jun 10;74(7):573–9. doi: 10.1136/jech-2019-213435 (PMC7337231; doi:10.1136/jech-2019-213435), 2020-06-10

No. of contacts with primary healthcare

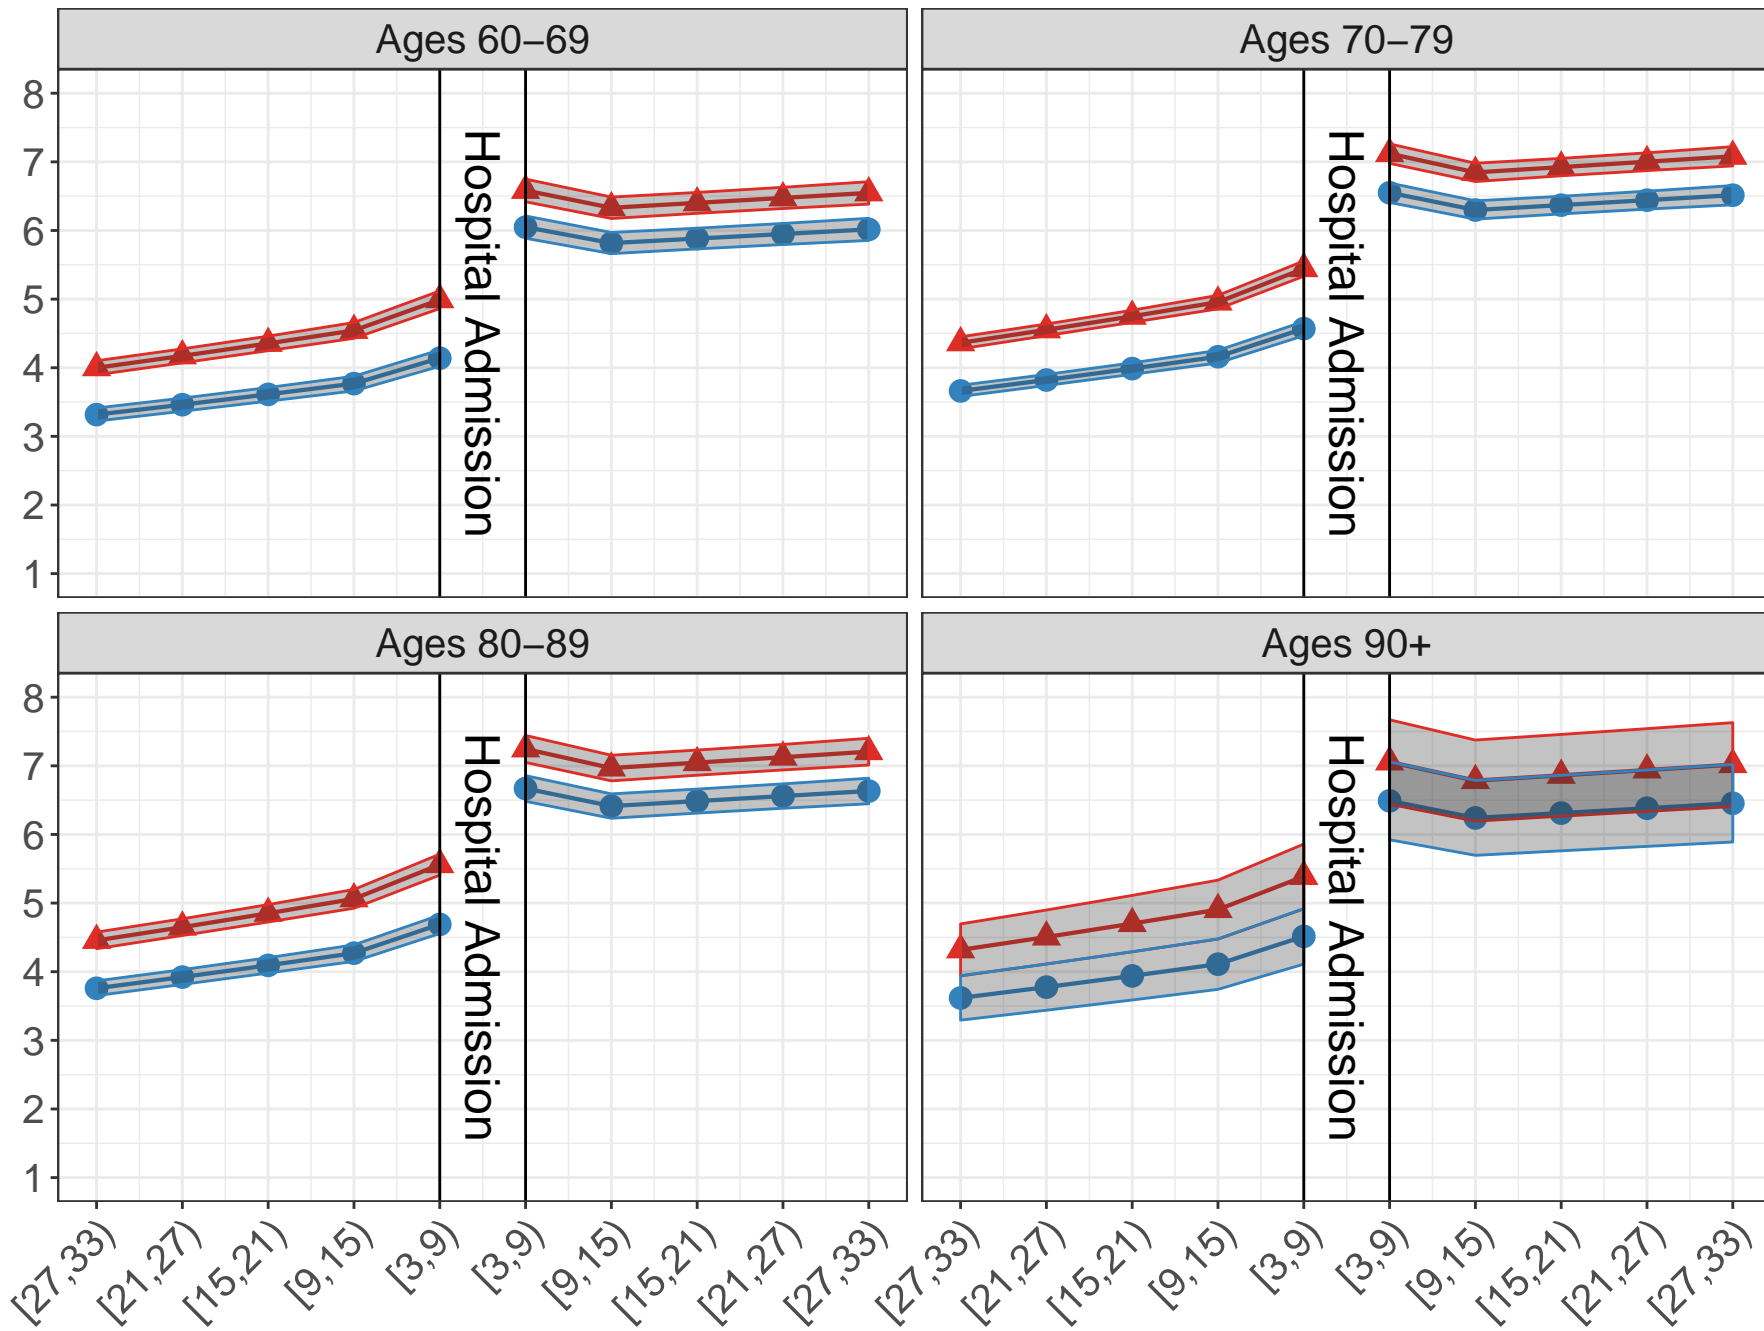

▲ Women  
● Men

Months before/ after hospital admission

Supplement: jech-2019-213435s002.pdf [file jech-2019-213435s002.pdf]

No. of contacts with primary healthcare

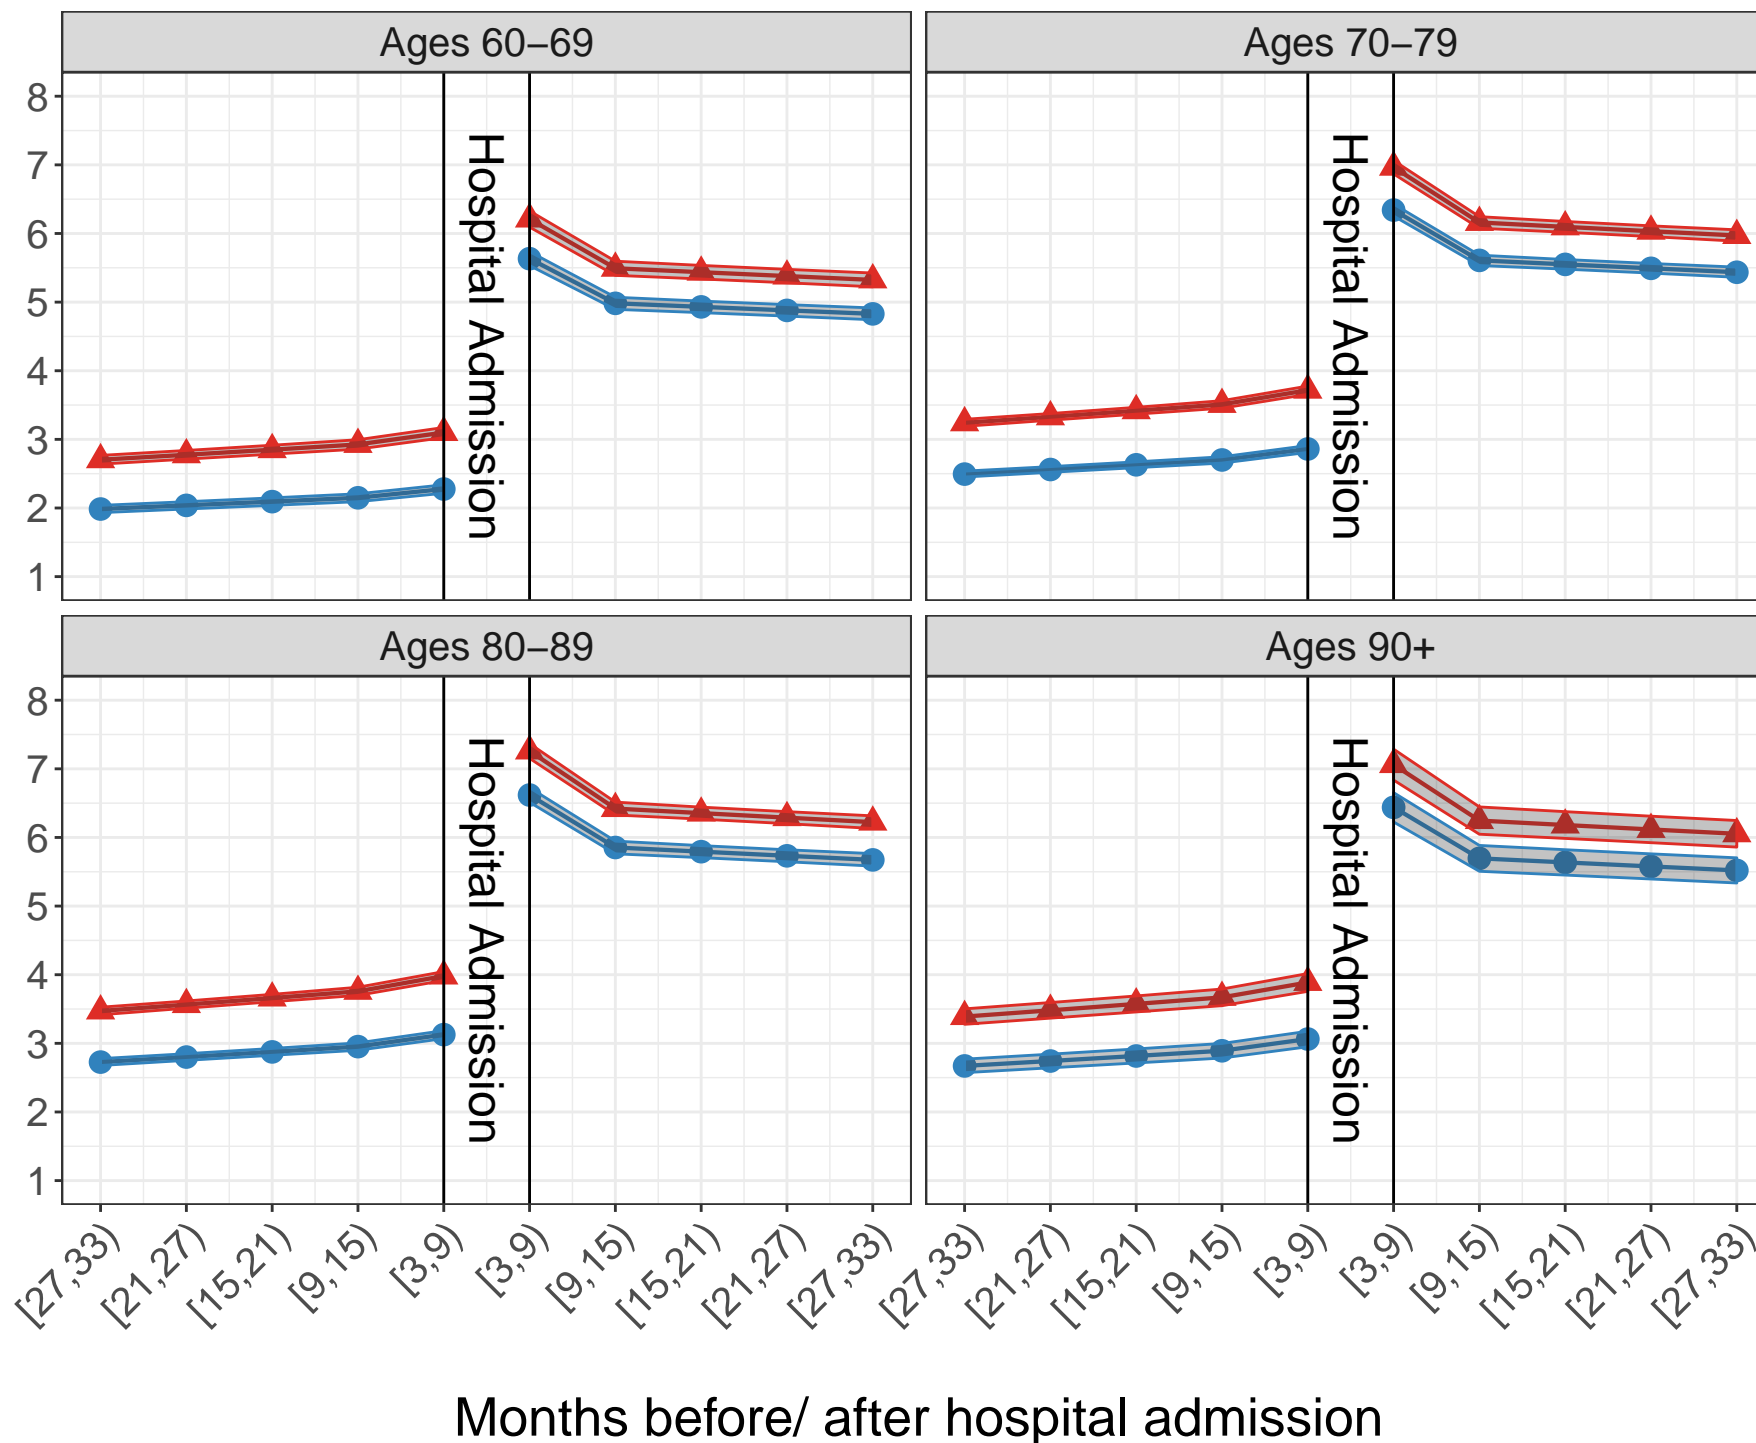

▲ Women  
● Men

Months before/ after hospital admission

Supplement: jech-2019-213435s003.pdf [file jech-2019-213435s003.pdf]

No. of contacts with primary healthcare

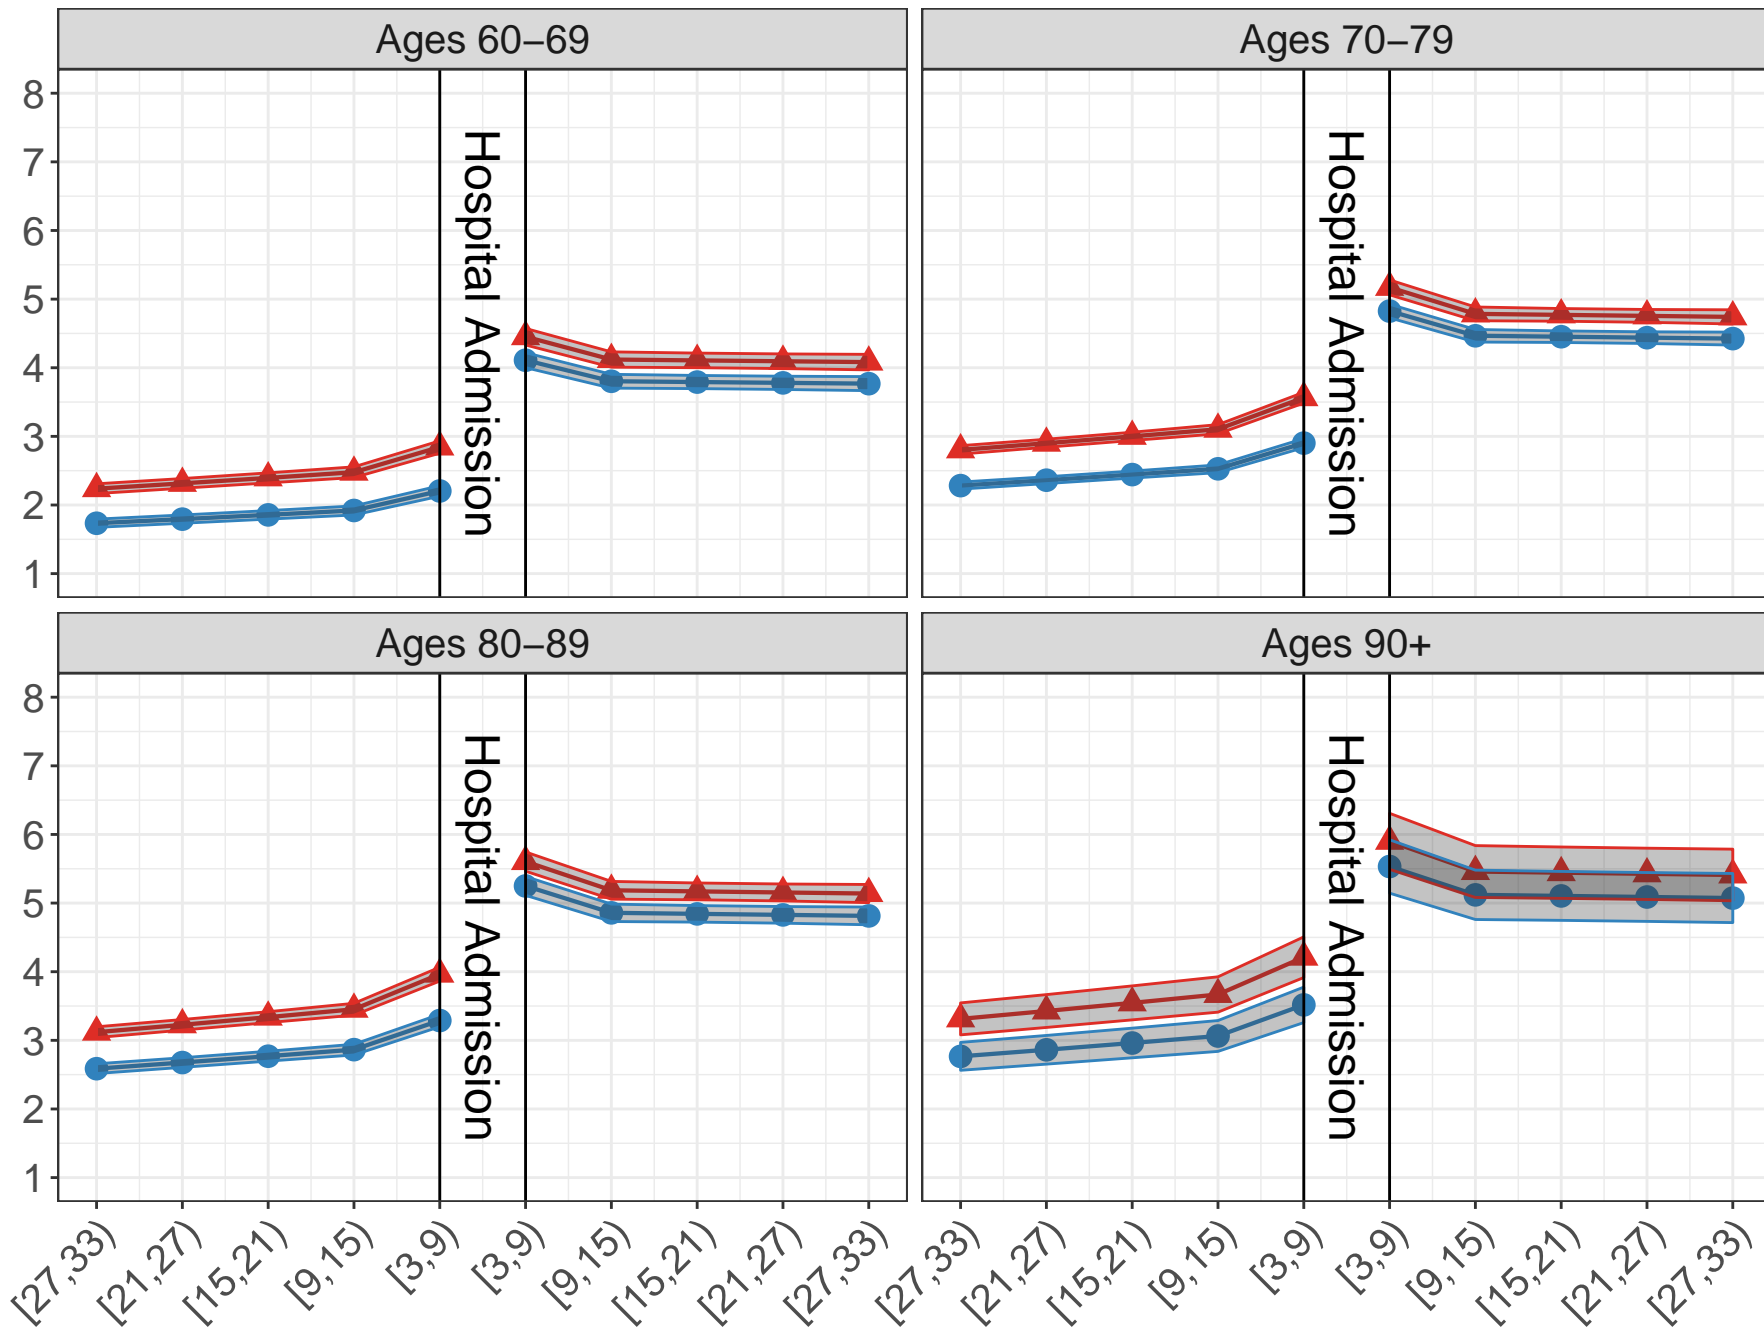

▲ Women  
● Men

Months before/ after hospital admission

Supplement: jech-2019-213435s004.pdf [file jech-2019-213435s004.pdf]
